# Supplementary material for: Excessive daytime sleepiness and metabolic syndrome in men with obstructive sleep apnea: a large cross-sectional study
Source: PubMed Central journal article supplement (PMC5668082; doi:10.18632/oncotarget.19113), 2017-07-08
Supplement: oncotarget-08-79693-s001.pdf [file oncotarget-08-79693-s001.pdf]

## **Excessive daytime sleepiness and metabolic syndrome in men with obstructive sleep apnea: a large cross-sectional study**

### **SUPPLEMENTARY MATERIALS**

**For Supplementary Tables see in Supplementray Files**
